# Supplementary material for: Coordination and oxidation properties of ZBTB20: CX 2 CX 12 HX 3 H-type zinc fingers
Source: Royal Society of Chemistry journal article supplement (doi:10.1039/d5dt02032h), 2026-01-01
Supplement: d5dt02032h1.pdf [file d5dt02032h1.pdf]

**Supplementary Information**

**for**

**Coordination and oxidation properties of ZBTB20: CX<sub>2</sub>CX<sub>12</sub>HX<sub>3</sub>H-type zinc fingers**

Hyunyong Kim,<sup>a,‡</sup> Yunha Hwang,<sup>a,‡</sup> Hyunwoo Jung,<sup>b</sup> Jin Sung Cheong,<sup>c</sup> Jiyeon Han,<sup>\*b</sup>

and Seung Jae Lee<sup>\*a,d</sup>

<sup>1</sup>Department of Chemistry, Jeonbuk National University, 54896 Jeonju, Republic of Korea.

<sup>2</sup>Department of Applied Chemistry, University of Seoul, Seoul 02504, Republic of Korea

<sup>3</sup>Department of Neurosurgery, Wonkwang University Hospital, Iksan 54538, Republic of Korea.

<sup>4</sup>Research Institute for the Molecular Biology and Genetics, Jeonbuk National University, 54896 Jeonju, Republic of Korea.

<sup>‡</sup>These authors contributed equally to this work.

<sup>\*</sup>To whom correspondence should be addressed: slee026@jbnu.ac.kr and jiyeonhan@uos.ac.kr

## 20 Table of Contents

|    |                   |                                                                                       |     |
|----|-------------------|---------------------------------------------------------------------------------------|-----|
| 21 | <b>Figure S1</b>  | Amino acid sequence of ZBTB20 from <i>Homo sapiens</i>                                | S3  |
| 22 | <b>Figure S2</b>  | Structural basis of the ZBTB20(ZF1–4)-mediated recognition of the <i>afp</i> promoter | S4  |
| 23 | <b>Figure S3</b>  | Sequence alignment of mouse ZBTB20 and <i>Homo sapiens</i> ZBTB20                     | S6  |
| 24 | <b>Figure S4</b>  | Crystal structure of mouse ZBTB20(ZF1–4) bound to the mouse <i>afp</i> promoter       | S7  |
| 25 | <b>Figure S5</b>  | Codon-optimized DNA sequence of ZBTB20(ZF1–5) from <i>Homo sapiens</i>                | S8  |
| 26 | <b>Figure S6</b>  | Sequence and characterization of purified ZBTB20(ZFs)                                 | S9  |
| 27 | <b>Figure S7</b>  | HT voltage and absorbance recorded during CD measurements of ZBTB20(ZFs)              | S10 |
| 28 | <b>Figure S8</b>  | pH-dependent oxidation of apo-ZBTB20(ZF1–4)                                           | S11 |
| 29 | <b>Figure S9</b>  | TCEP concentration-dependent oxidation of apo-ZBTB20(ZF1–4)                           | S12 |
| 30 | <b>Figure S10</b> | Comparison of % metal bound under different TCEP concentrations                       | S13 |
| 31 | <b>Figure S11</b> | Upstream sequence of the <i>brn2</i> promoter region from <i>Homo sapiens</i>         | S14 |
| 32 | <b>Figure S12</b> | Schematic overview of the competition assay                                           | S15 |
| 33 | <b>Table S1</b>   | % Metal bound of apo-ZBTB20(ZFs) under different pH and TCEP conditions               | S16 |

34

## 35 References

36 S17

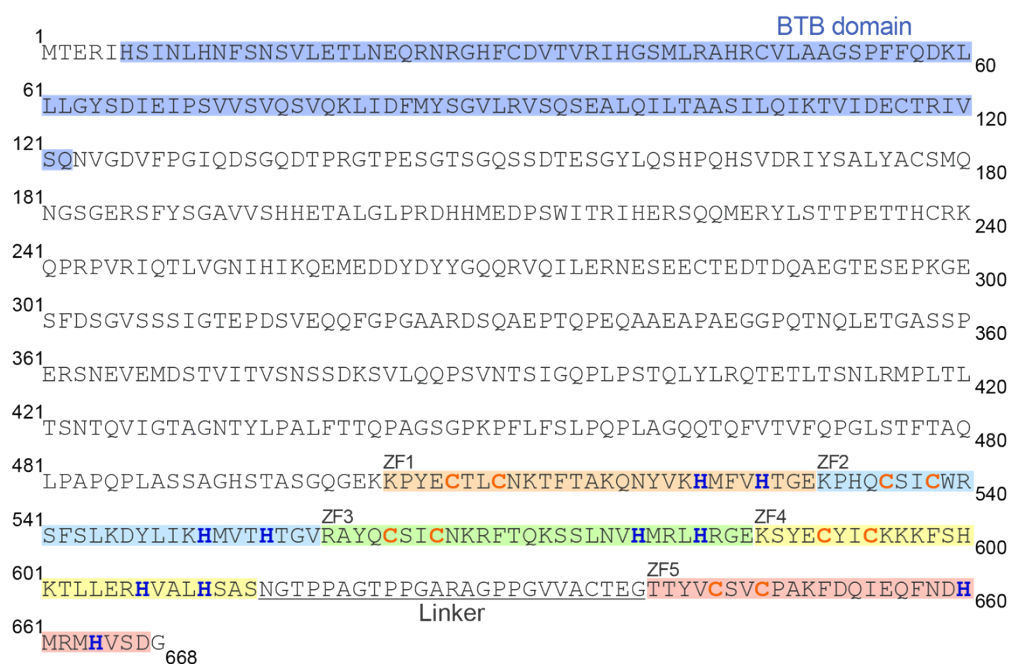

37

38 **Figure S1.** Amino acid sequence of ZBTB20 from *Homo sapiens* (NCBI: AAH29041.1).<sup>1</sup> The BTB domain  
 39 is highlighted in dark blue. Each zinc finger domain (ZF1–5) is highlighted in a distinct color: ZF1 in  
 40 orange, ZF2 in light blue, ZF3 in light green, ZF4 in yellow, and ZF5 in salmon pink. Zn<sup>2+</sup>-coordinating  
 41 cysteine residues are shown in orange, and histidine residues are indicated in blue. The linker sequence  
 42 connecting ZF4 and ZF5 is underlined in blue.

43

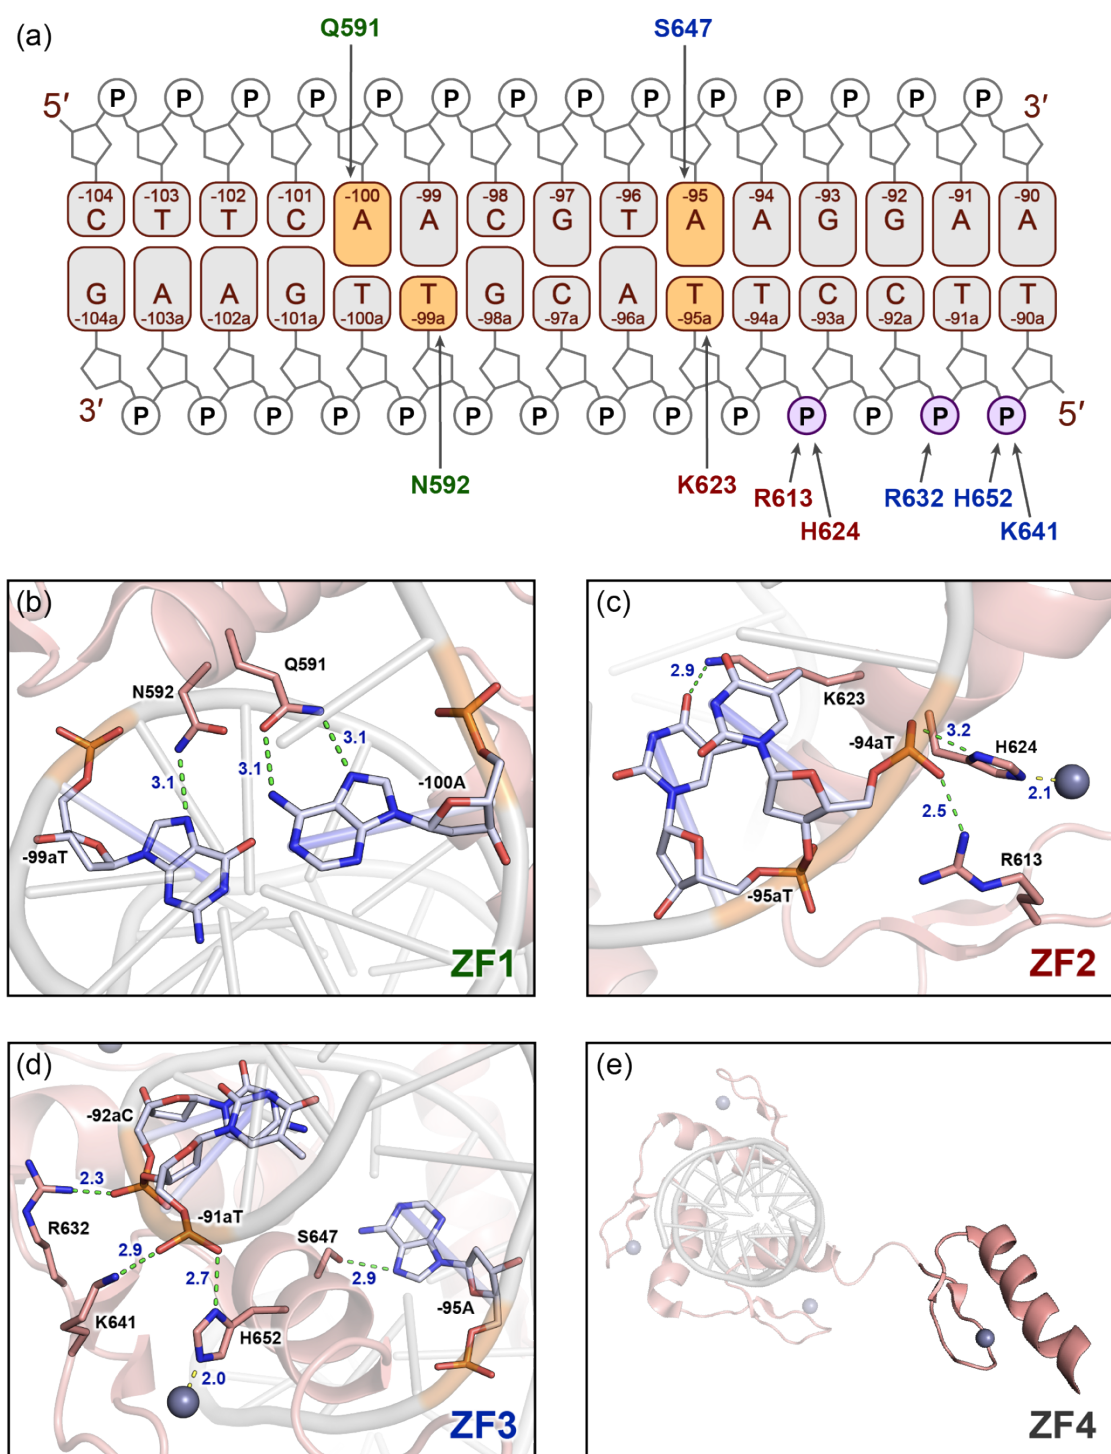

44

45 **Figure S2.** Structural basis of the ZBTB20(ZF1–4)-mediated recognition of the *afp* promoter.<sup>2</sup> (a) Ladder  
46 diagram illustrating the DNA sequence within the mouse *afp* promoter and the specific nucleotides

47 contacted by each ZF domain of mouse ZBTB20. The upper and lower strands represent the sense and  
48 antisense strands, respectively, and residues engaging in base-specific or phosphate-backbone interactions  
49 are indicated above or below the corresponding nucleotide positions. (b–e) Structural depiction of the  
50 contacts formed between the mouse *afp* promoter and (b) ZF1, (c) ZF2, (d) ZF3, (e) ZF4. The gray sphere  
51 represents the  $\text{Zn}^{2+}$  ion. Hydrogen bonds are shown as green dashed lines, and coordination bonds to  $\text{Zn}^{2+}$   
52 are indicated by yellow dashed lines.

53

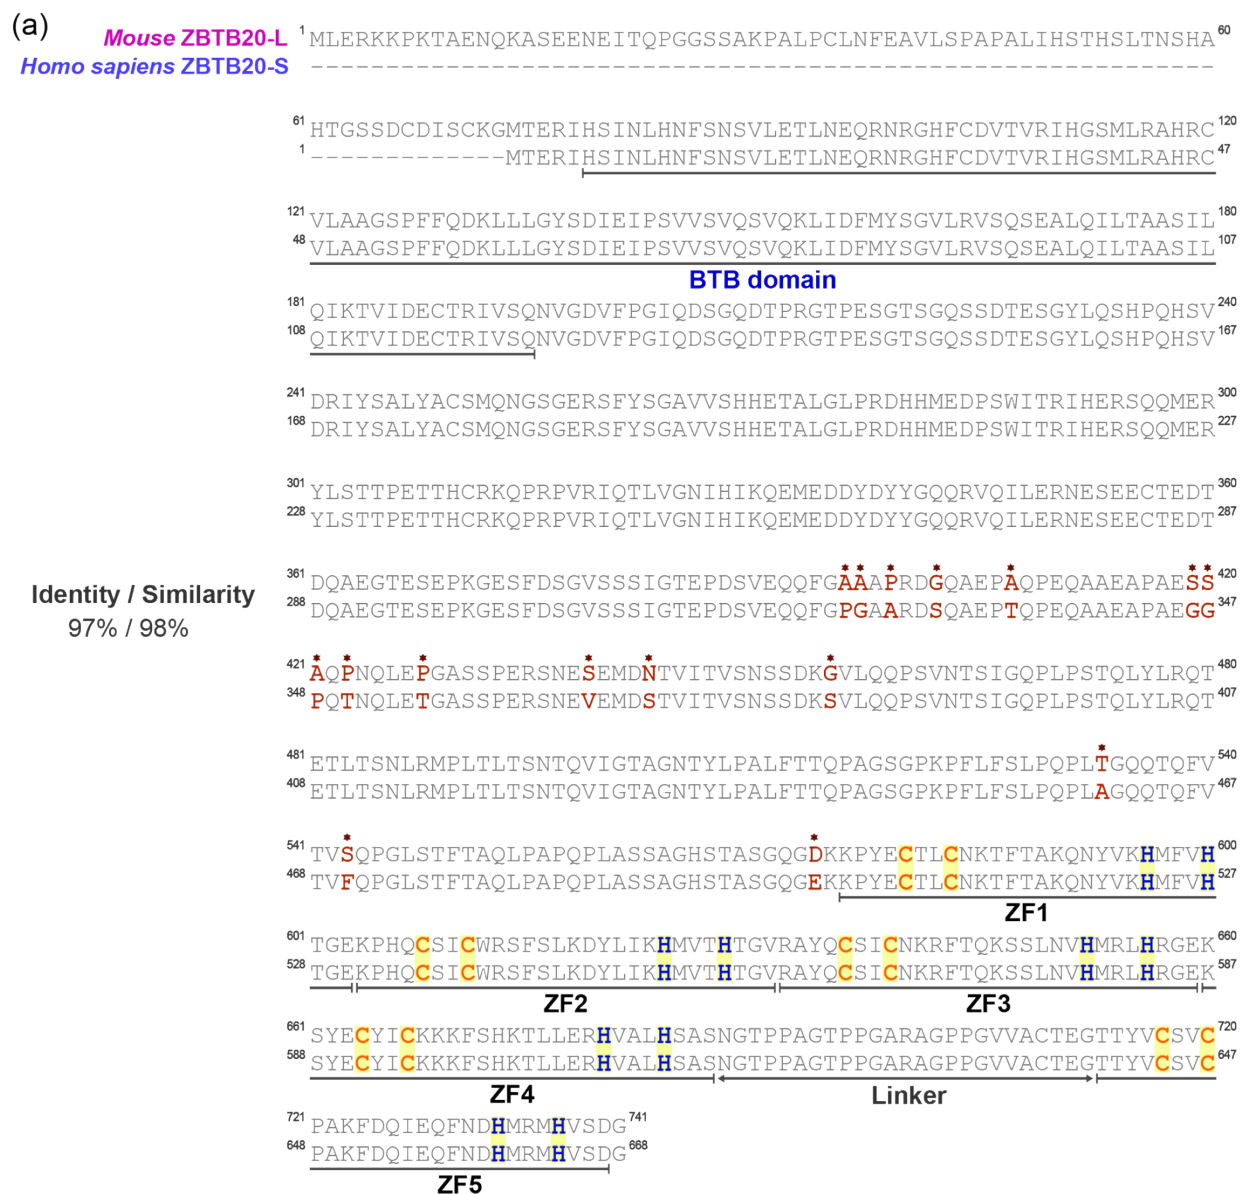

**Figure S3.** Sequence alignment of mouse ZBTB20 and *Homo sapiens* ZBTB20.<sup>2</sup> Mismatched residues are shown in red bold with a star, and cysteine and histidine in each ZF domain are highlighted with colored boxes.

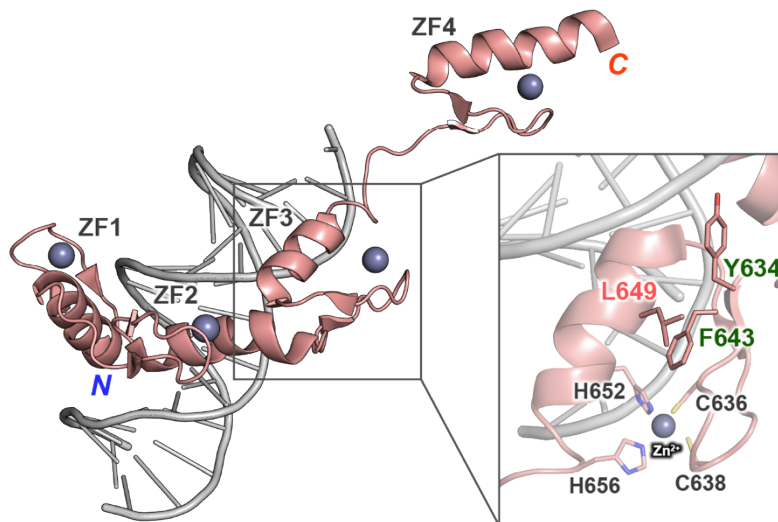

59

60 **Figure S4.** Crystal structure of mouse ZBTB20(ZF1–4) bound to the mouse *afp* promoter (PDB: 9JZT).<sup>2</sup>  
 61 Zinc ions are depicted as gray spheres. The inset highlights residues in ZF3—Tyr634, Phe643, and  
 62 Leu649—that form a hydrophobic core positioned adjacent to the  $\text{Zn}^{2+}$ -coordinating cysteine and histidine  
 63 residues, contributing to local structural stability and maintaining the DNA-binding geometry.<sup>3</sup>

*Homo sapiens zbtb20* → ATG GAA AAA AAG CCT TAT GAG TGC ACT CTC TGC AAC AAG ACT TTC ACC GCC  
*Codon optimized-zbtb20* → ATG GAG AAA AAA CCG TAT GAA TGC ACC CTG TGC AAC AAA ACG TTT ACC GCG  
*Homo sapiens ZBTB20* → M E K K P Y E C T L C N K T F T A

AAA CAG AAC TAC GTC AAG CAC ATG TTC GTA CAC ACA GGT GAG AAG CCC CAC CAA TGC AGC ATC TGT  
 AAA CAG AAC TAT GTG AAA CAC ATG TTT GTT CAC ACC GGT GAA AAA CCG CAC CAG TGC AGC ATC TGC  
 K Q N Y V K H M F V H T G E K P H Q C S I C

TGG CGC TCC TTC TCC TTA AAG GAT TAC CTT ATC AAG CAC ATG GTG ACA CAC ACA GGA GTG AGG GCA  
 TGG CGT AGC TTC TCT CTG AAA GAC TAC CTG ATC AAA CAC ATG GTG ACC CAC ACC GGT GTT CGC GCT  
 W R S F S L K D Y L I K H M V T H T G V R A

TAC CAG TGT AGT ATC TGC AAC AAG CGC TTC ACC CAG AAG AGC TCC CTC AAC GTG CAC ATG CGC CTC  
 TAC CAG TGC TCT ATC TGC AAC AAG CGC TTC ACC CAA AAA TCC TCT CTG AAC GTT CAC ATG CGC CTG  
 Y Q C S I C N K R F T Q K S S L N V H M R L

CAC CGG GGA GAG AAG TCC TAC GAG TGC TAC ATC TGC AAA AAG AAG TTC TCT CAC AAG ACC CTC CTG  
 CAC CGC GGT GAA AAA TCT TAT GAA TGC TAC ATT TGC AAA AAG AAA TTC TCT CAC AAA ACC CTG CTG  
 H R G E K S Y E C Y I C K K K F S H K T L L

GAG CGA CAC GTG GCC CTG CAC AGT GCC AGC AAT GGG ACC CCC CCT GCA GGC ACA CCC CCA GGT GCC  
 GAA CGT CAT GTG GCG CTG CAC AGC GCG AGC AAC GGT ACC CCG CCG GCG GGC ACC CCG CCG GGT GCG  
 E R H V A L H S A S N G T P P A G T P P G A

CGC GCT GGC CCC CCA GGC GTG GTG GCC TGC ACG GAG GGG ACC ACT TAC GTC TGC TCC GTC TGC CCA  
 CGT GCG GGT CCG CCG GGT GTT GTG GCA TGT ACT GAA GGT ACC ACC TAC GTT TGC TCC GTG TGC CCG  
 R A G P P G V V A C T E G T T Y V C S V C P

GCA AAG TTT GAC CAA ATC GAG CAG TTC AAC GAC CAC ATG AGG ATG CAT GTG TCT GAC GGA TAA  
 GCA AAA TTT GAT CAG ATT GAA CAG TTC AAC GAT CAC ATG CGT ATG CAC GTT AGC GAT GGT TAA  
 A K F D Q I E Q F N D H M R M H V S D G

64

65 **Figure S5.** Codon-optimized DNA sequence of ZBTB20(ZF1–5) from *Homo sapiens*. Comparison of the  
 66 *zbtb20* DNA sequence (NCBI: BC029041.1) with its codon-optimized version for *Escherichia coli*  
 67 expression. The original sequence is shown in black, and codon-optimized nucleotides are indicated in  
 68 orange. The corresponding amino acid sequence of ZBTB20(ZF1–5) is shown in bold purple below each  
 69 codon.

70



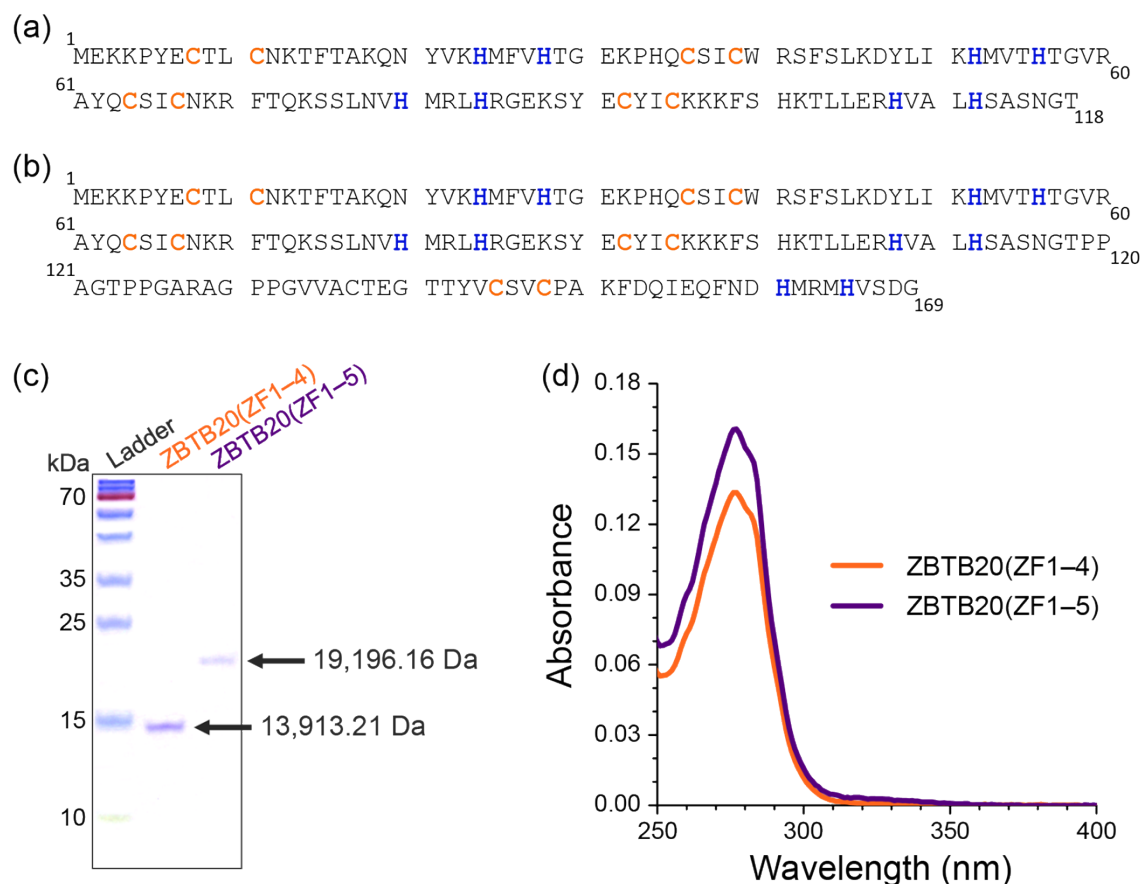

71

72 **Figure S6.** Sequence and characterization of purified ZBTB20(ZFs). (a–b) Amino acid sequences of (a)  
73 ZBTB20(ZF1–4) and (b) ZBTB20(ZF1–5). Zn<sup>2+</sup>–coordinating cysteine residues are shown in orange and  
74 histidine residues in blue. (c–d) SDS–PAGE analysis and UV–Visible spectra of purified (c) ZBTB20(ZF1–  
75 4) and (d) ZBTB20(ZF1–5). For SDS–PAGE, ZBTB20(ZF1–4) and ZBTB20(ZF1–5) were diluted to 15  
76 μM and 10 μM, respectively. UV–Vis spectroscopy was performed using 8 μM ZBTB20(ZF1–4) and 9 μM  
77 ZBTB20(ZF1–5).

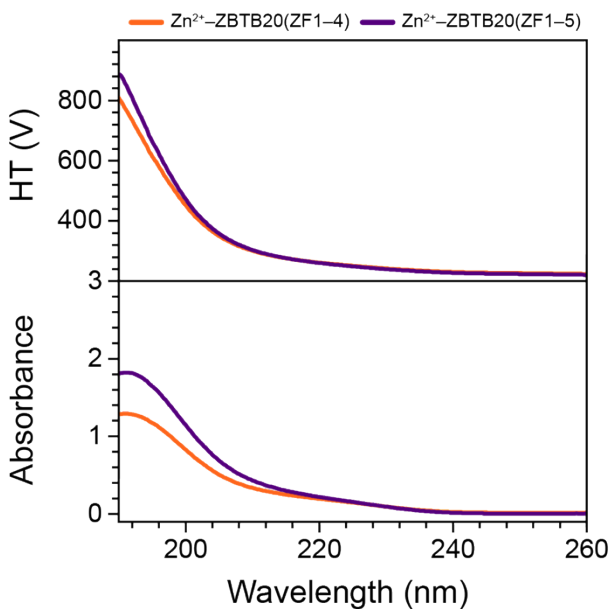

78

79 **Figure S7.** HT voltage and absorbance recorded during CD measurements of ZBTB20(ZFs). Changes in  
80 HT voltage, and absorbance of  $\text{Zn}^{2+}$ -ZBTB20(ZF1-4) and  $\text{Zn}^{2+}$ -ZBTB20(ZF1-5). The HT and absorbance  
81 were monitored in parallel during CD measurements. All measurements were performed at a protein  
82 concentration of 20  $\mu\text{M}$  in 20 mM HEPES (pH 7.4) containing 150 mM NaF. CD spectra were collected  
83 using a 0.5-mm quartz cuvette with a 2-nm bandwidth and a scanning speed of 50  $\text{nm} \cdot \text{min}^{-1}$ .

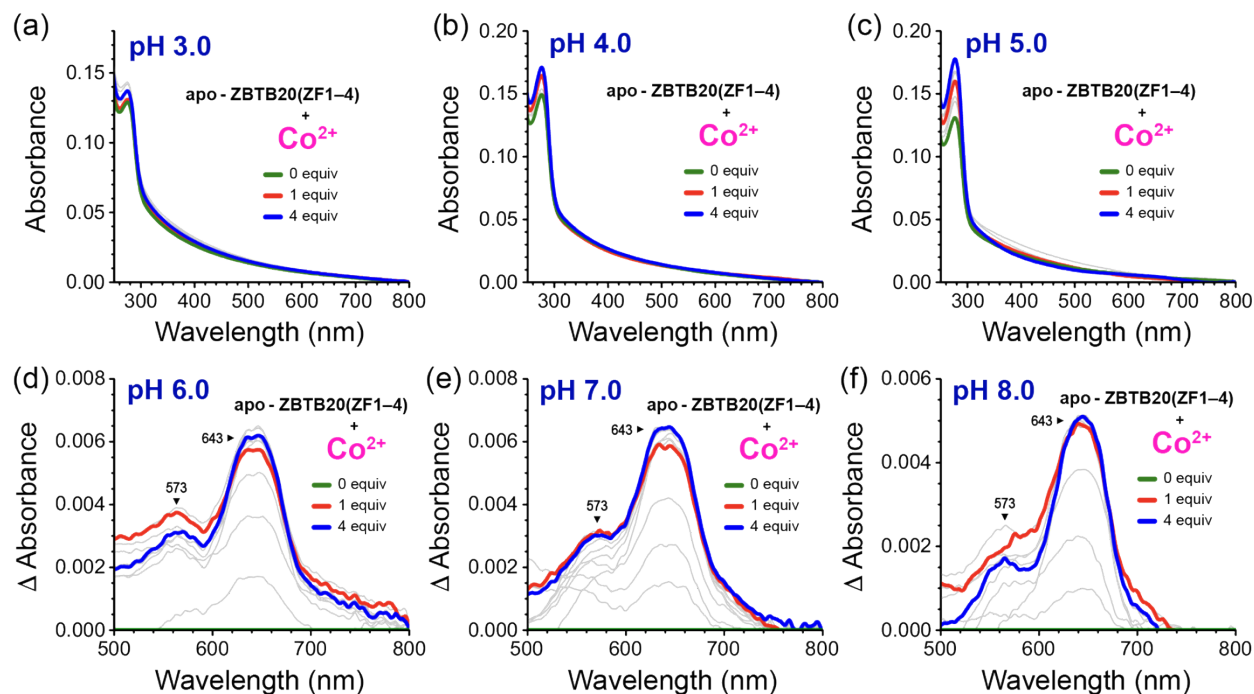

**Figure S8.** pH-dependent oxidation of apo-ZBTB20(ZF1-4). d-d transition bands were measured using a UV-Visible spectrophotometer, and the % metal bound under each condition was calculated from the absorbance maxima at 643 nm.<sup>4</sup>  $\Delta$  Absorbance represents the changes in absorbance relative to apo-ZBTB20(ZF1-4) upon  $\text{Co}^{2+}$  titration. Experiments were conducted at (a-c) pH 3.0, 4.0 and 5.0 (100 mM sodium acetate), (d) pH 6.0 (100 mM MES monohydrate), (e) pH 7.0 (100 mM MOPS), and (f) pH 8.0 (100 mM Tris), with all buffers containing 150 mM NaCl and 1 mM TCEP. Each experiment was performed inside an  $\text{N}_2(\text{g})$ -filled glovebox.

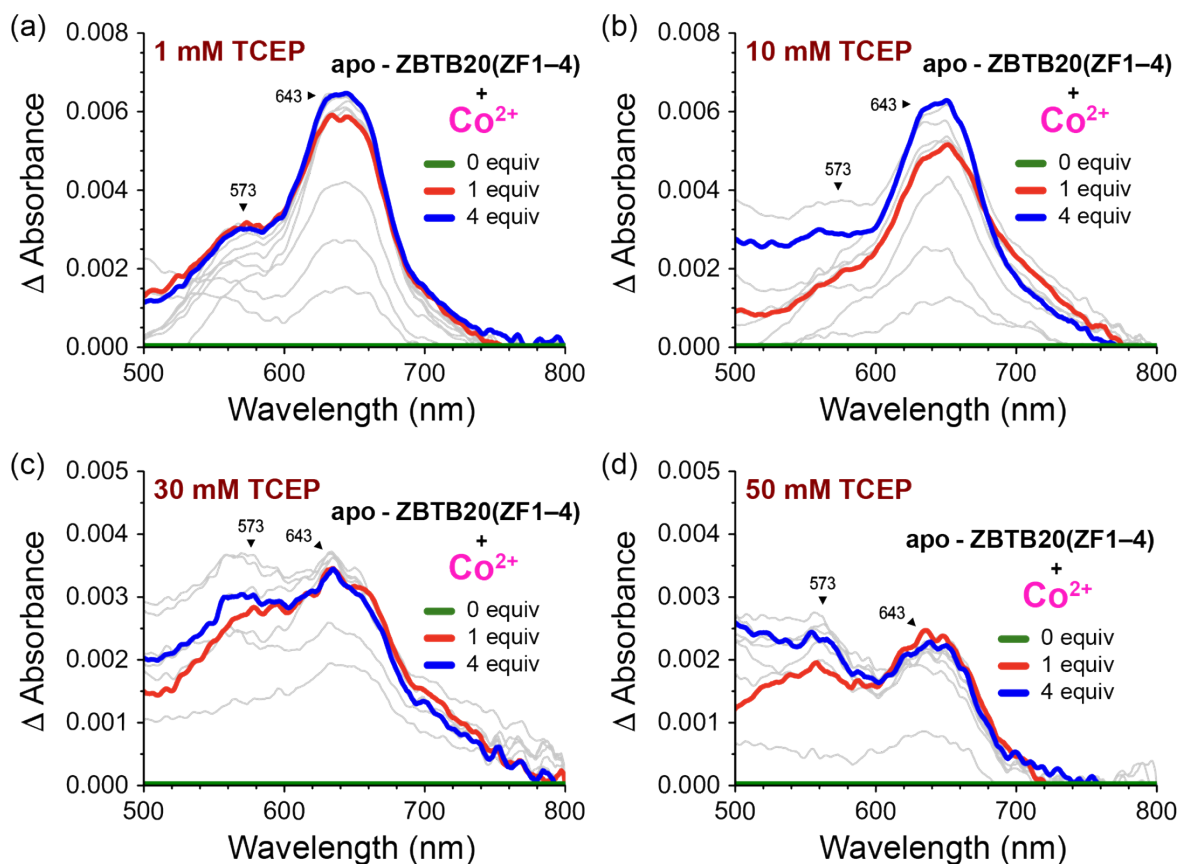

94

95 **Figure S9.** TCEP concentration-dependent oxidation of apo-ZBTB20(ZF1-4).  $\text{Co}^{2+}$ -induced d-d transition  
 96 bands between 500 and 800 nm were monitored by UV-Visible spectroscopy, and were observed at 573  
 97 nm and 643 nm.  $\Delta$  Absorbance represents the changes in absorbance relative to apo-ZBTB20(ZF1-4) upon  
 98  $\text{Co}^{2+}$  titration. Experiments were conducted in a buffer composed of 100 mM MOPS (pH 7.0) and 150 mM  
 99 NaCl, with (a) 1 mM TCEP, (b) 10 mM TCEP, (c) 30 mM TCEP, or (d) 50 mM TCEP. Each experiment  
 100 was performed inside an  $\text{N}_2(\text{g})$ -filled glovebox.

101

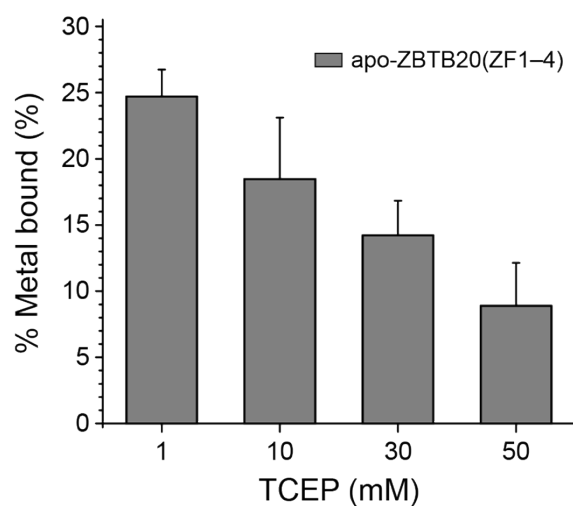

102

103 **Figure S10.** Comparison of % Metal bound under different TCEP concentrations. The metal binding  
 104 percentage of apo-ZBTB20(ZF1-4) was determined using the absorbance maximum at 643 nm,  
 105 corresponding to the  $\text{Co}^{2+}$ -dependent d-d transition band observed upon metal coordination, and assessed  
 106 under varying TCEP concentrations. Error bars represent the standard deviation from five measurements.

107

108



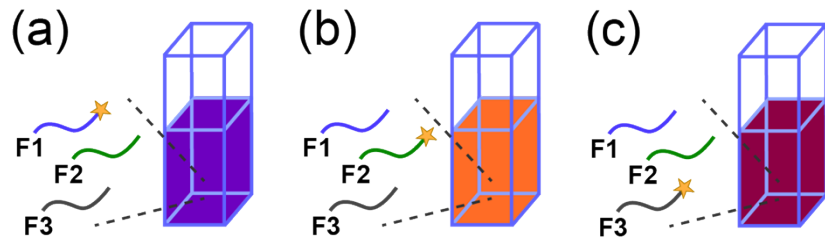

112

113 **Figure S12.** Schematic overview of the competition assay. (a–c) Competition assay using (a) 6-FAM  
 114 labeled F1, (b) 6-FAM labeled F2, and (c) 6-FAM labeled F3. For each experiment, one fluorescently  
 115 labeled *brn2* fraction and two unlabeled double-stranded *brn2* fractions were mixed in a buffer, with each  
 116 DNA fraction diluted to 5 nM to maintain a 1:1:1 ratio. ZBTB20(ZF1–4) was titrated into the mixture at  
 117 the indicated concentrations, followed by a 2-min incubation before measurement.

| Protein       | pH  | TCEP<br>(mM) | % Metal bound |
|---------------|-----|--------------|---------------|
| ZBTB20(ZF1–4) | 3.0 | 1.0          | 1.6 (± 1.1)   |
| ZBTB20(ZF1–4) | 4.0 | 1.0          | 1.4 (± 1.3)   |
| ZBTB20(ZF1–4) | 5.0 | 1.0          | 2.9 (± 2.0)   |
| ZBTB20(ZF1–4) | 6.0 | 1.0          | 24.8 (± 2.4)  |
| ZBTB20(ZF1–4) | 7.0 | 1.0          | 24.7 (± 2.0)  |
| ZBTB20(ZF1–4) | 7.4 | 1.0          | 19.6 (± 3.1)  |
| ZBTB20(ZF1–4) | 8.0 | 1.0          | 19.0 (± 5.2)  |
| ZBTB20(ZF1–4) | 7.0 | 10.0         | 18.5 (± 4.6)  |
| ZBTB20(ZF1–4) | 7.0 | 30.0         | 14.2 (± 2.6)  |
| ZBTB20(ZF1–4) | 7.0 | 50.0         | 8.9 (± 3.2)   |
| ZBTB20(ZF1–5) | 7.4 | 1.0          | 49.3 (± 5.4)  |

119 **Table S1.** % Metal bound of apo-ZBTB20(ZFs) under different pH and TCEP conditions.

120



121 **Reference**

- 122 1. H. Kim, Y. Hwang, J. S. Cheong and S. J. Lee, *RSC Chem. Biol.*, 2025, **6**, 1165-1173.
- 123 2. L. Yang, H. Xie, X. Wan, M. Li, M. Lv, Y. Duan, Y. Shi, W. J. Zhang and F. Li, *Structure*,
- 124 2025, **33**, 1398-1407.
- 125 3. K. Kluska, J. Adamczyk and A. Krężel, *Metallomics*, 2018, **10**, 248-263.
- 126 4. S. Park, Y. Hwang, K. S. Eom, J. S. Cheong and S. J. Lee, *Protein Sci.*, 2025, **34**, e70278.
- 127 5. M. Nagao, T. Ogata, Y. Sawada and Y. Gotoh, *Nat. Commun.*, 2016, **7**, 11102-11115.

128
